# Supplementary material for: Antimicrobial Effects of Inula viscosa Extract on the In Situ Initial Oral Biofilm
Source: Nutrients. 2021 Nov 11;13(11):4029. doi: 10.3390/nu13114029 (PMC8622444; doi:10.3390/nu13114029)
Supplement: Supplementary file 1 [file nutrients-13-04029-s001.zip › nutrients-1393311-supplementary.pdf]

## Article

# Antimicrobial Effects of *Inula viscosa* Extract on the In Situ Initial Oral Biofilm

Hannah Kurz <sup>1</sup>, Lamprini Karygianni <sup>2</sup>, Aikaterini Argyropoulou <sup>3</sup>, Elmar Hellwig <sup>1</sup>, Alexios Leandros Skaltsounis <sup>3</sup>, Annette Wittmer <sup>4</sup>, Kirstin Vach <sup>5</sup> and Ali Al-Ahmad <sup>1,\*</sup>

<sup>1</sup> Department of Operative Dentistry and Periodontology, Medical Center, University of Freiburg, Faculty of Medicine, University of Freiburg, Freiburg, Germany; hannahkurz@gmx.net; elmar.hellwig@uniklinik-freiburg.de, ali.al-ahmad@uniklinik-freiburg.de

<sup>2</sup> Clinic of Conservative and Preventive Dentistry, Center of Dental Medicine University of Zurich, Switzerland; lamprini.karygianni@zzm.uzh.ch

<sup>3</sup> Department of Pharmacognosy and Natural Products Chemistry, Faculty of Pharmacy, National and Kapodistrian University of Athens, Athens, Greece

<sup>4</sup> Institute of Medical Microbiology and Hygiene, Faculty of Medicine, University of Freiburg, Freiburg, Germany

<sup>5</sup> Institute for Medical Biometry and Statistics, Faculty of Medicine and Medical Center, University of Freiburg, Freiburg, Germany

\* Correspondence: ali.al-ahmad@uniklinik-freiburg.de; phone: +49 761 27048940

## Table of Contents:

**Table S1:** Overview of the reagents used, including their brands and the countries where they were purchased

**Table S1:** Overview of the reagents used, including their brands and the countries where they were purchased

| Reagent                                                                                                 | Brand                                                                                      | Country             |
|---------------------------------------------------------------------------------------------------------|--------------------------------------------------------------------------------------------|---------------------|
| Aqua ad injectabilia                                                                                    | B. Braun                                                                                   | Melsungen, Germany  |
|                                                                                                         |                                                                                            |                     |
| Chlorhexidine                                                                                           | Pharmacy, University of Freiburg, Faculty of Medicine                                      | Freiburg, Germany   |
| Aqua destillata                                                                                         | Pharmacy, University of Freiburg, Faculty of Medicine                                      | Freiburg, Germany   |
| Dimethyl sulfoxide                                                                                      | Merck                                                                                      | Hohenbronn, Germany |
| Ethanol                                                                                                 | Honeywell                                                                                  | Seelze, Germany     |
| Formic Acid                                                                                             | Honeywell Morristown                                                                       | New Jersey, USA     |
| Live/Dead BacLight bacterial viability kit: 1.67 mM SYTO 9 nucleic acid stain, 1.67 mM propidium iodide | Life Technologies GmbH                                                                     | Darmstadt, Germany  |
| Sodium chloride (0.9)%                                                                                  | B. Braun                                                                                   | Melsungen, Germany  |
| Sodium hypochloride                                                                                     | Hedinger GmbH                                                                              | Stuttgart, Germany  |
| Phosphate-buffered saline                                                                               | Institute of Medical Microbiology and Hygiene, Faculty of Medicine, University of Freiburg | Freiburg, Germany   |
| Thymol (99%)                                                                                            | Carl Roth                                                                                  | Karlsruhe, Germany  |
